# Supplementary material
Source: PubMed Central journal article supplement (PMC4255984)
Supplement: NIHMS611810-supplement-NJP488473suppdata_pdf.pdf [file NIHMS611810-supplement-NJP488473suppdata_pdf.pdf]

## Supplementary Figures

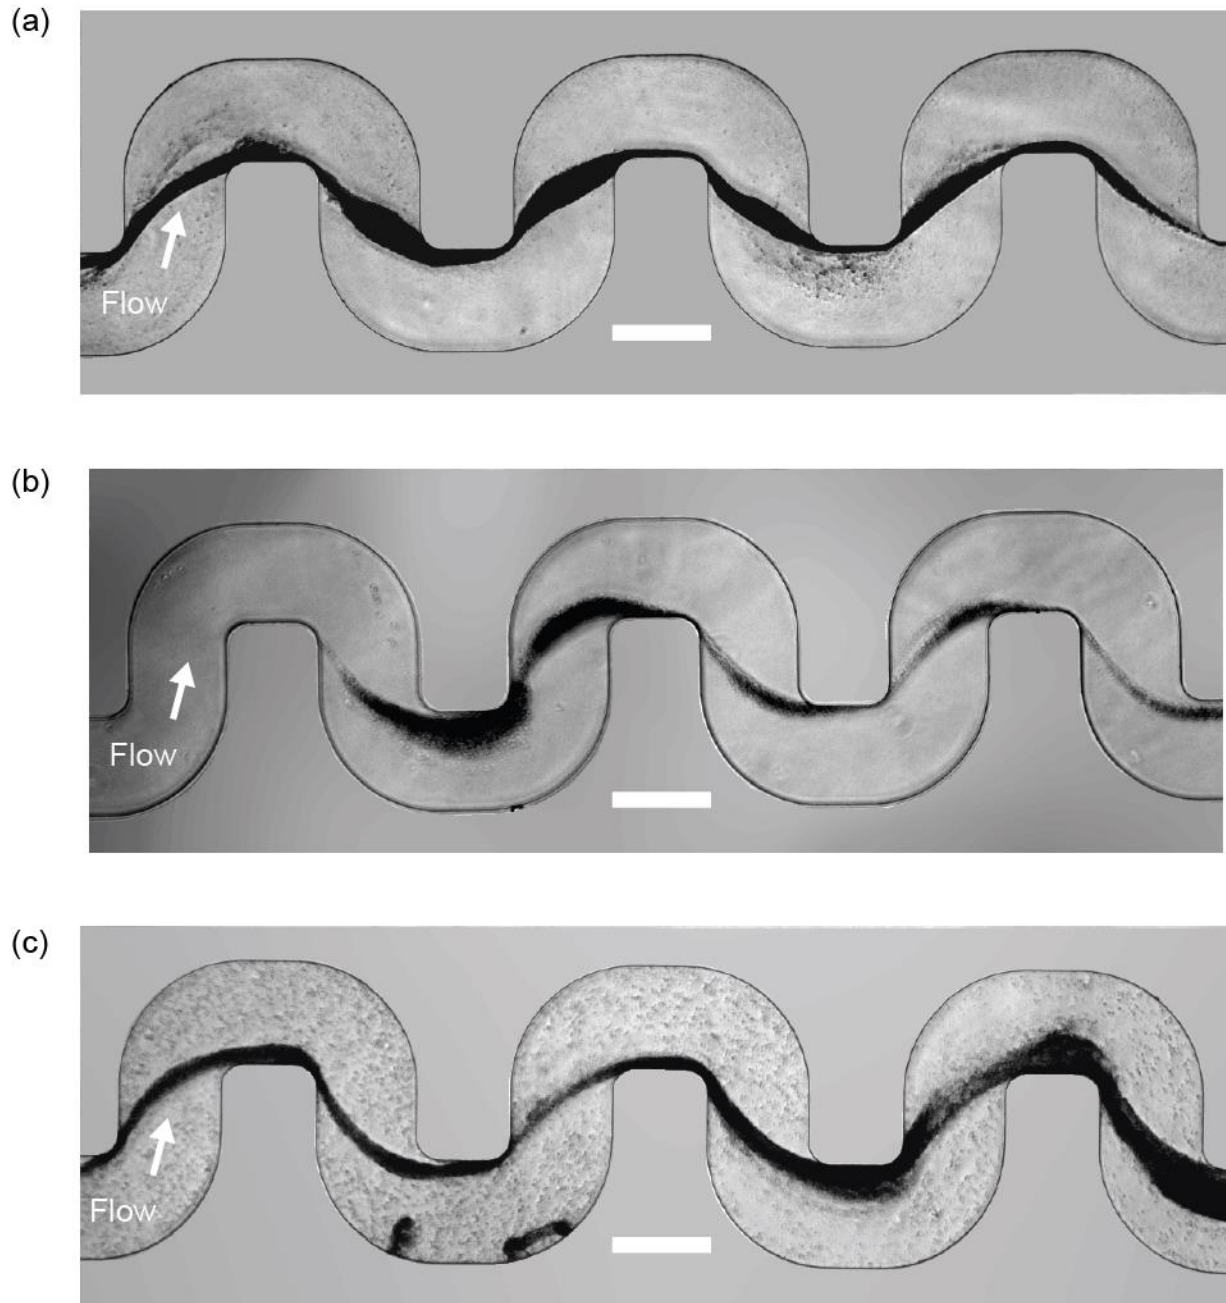

**Figure S1.** Different *S. aureus* strains form biofilm streamers. Cultures of each strain (at cell densities corresponding to  $OD_{600}=1.2$ ) flowed through blood-plasma-coated channels at a constant flow rate of 1.5  $\mu\text{L}/\text{min}$ . (a) *S. aureus* *agr* group II (strain RN6607). (b) *agr* group III (strain RN8465). (c) *agr* group IV (strain RN4850). The biofilm streamer morphology appears to be different for the strains with different *agr* systems. Images were acquired using bright field illumination. The scale bar represents 200  $\mu\text{m}$ .
